# Supplementary material
Source: PubMed Central journal article supplement (PMC8647932)
Supplement: NIHMS1739266-supplement-SI.pdf [file NIHMS1739266-supplement-SI.pdf]

## Contents

### Supplementary Figure 1-9 and Figure Legends

Supplementary Fig. 1 | Characterization and optimization of EO771 tumour organoids.

Supplementary Fig. 2 | Characterization of EO771 tumour organoids.

Supplementary Fig. 3 | CD8<sup>+</sup> T cell cytotoxicity in the co-cultures with mouse and human tumour organoids.

Supplementary Fig. 4 | Anti-tumour effects of BML-210 and CUDC-101 in mouse breast tumour models.

Supplementary Fig. 5 | Drug candidates do not promote MHC-I associated antigen presentation of non-tumour cells from tumour organoids.

Supplementary Fig. 6 | Drug candidates do not directly affect cytokine expression levels in CD8<sup>+</sup> T cells.

Supplementary Fig. 7 | Mass cytometry (CyTOF) analysis of immune cell profiles in EO771 tumours upon BML-210 treatment.

Supplementary Fig. 8 | Mass cytometry (CyTOF) single channel plots of immune cell profiles in EO771 tumours upon BML-210 treatment.

Supplementary Fig. 9 | The effect of drug treatment on the cytotoxicity of autologous CD8<sup>+</sup> T cell on patient-derived breast tumour organoids.

### Supplementary Table 1-6

Supplementary Table 1. Epigenetic inhibitors library (Cayman Chemical)

Supplementary Table 2. Antibody panel for CyTOF analysis

Supplementary Table 3. Clinical information of human breast cancer samples.

Supplementary Table 4. Mouse breast tumour organoid culture medium

Supplementary Table 5. RT-qPCR Primers

Supplementary Table 6. Reagents and resources

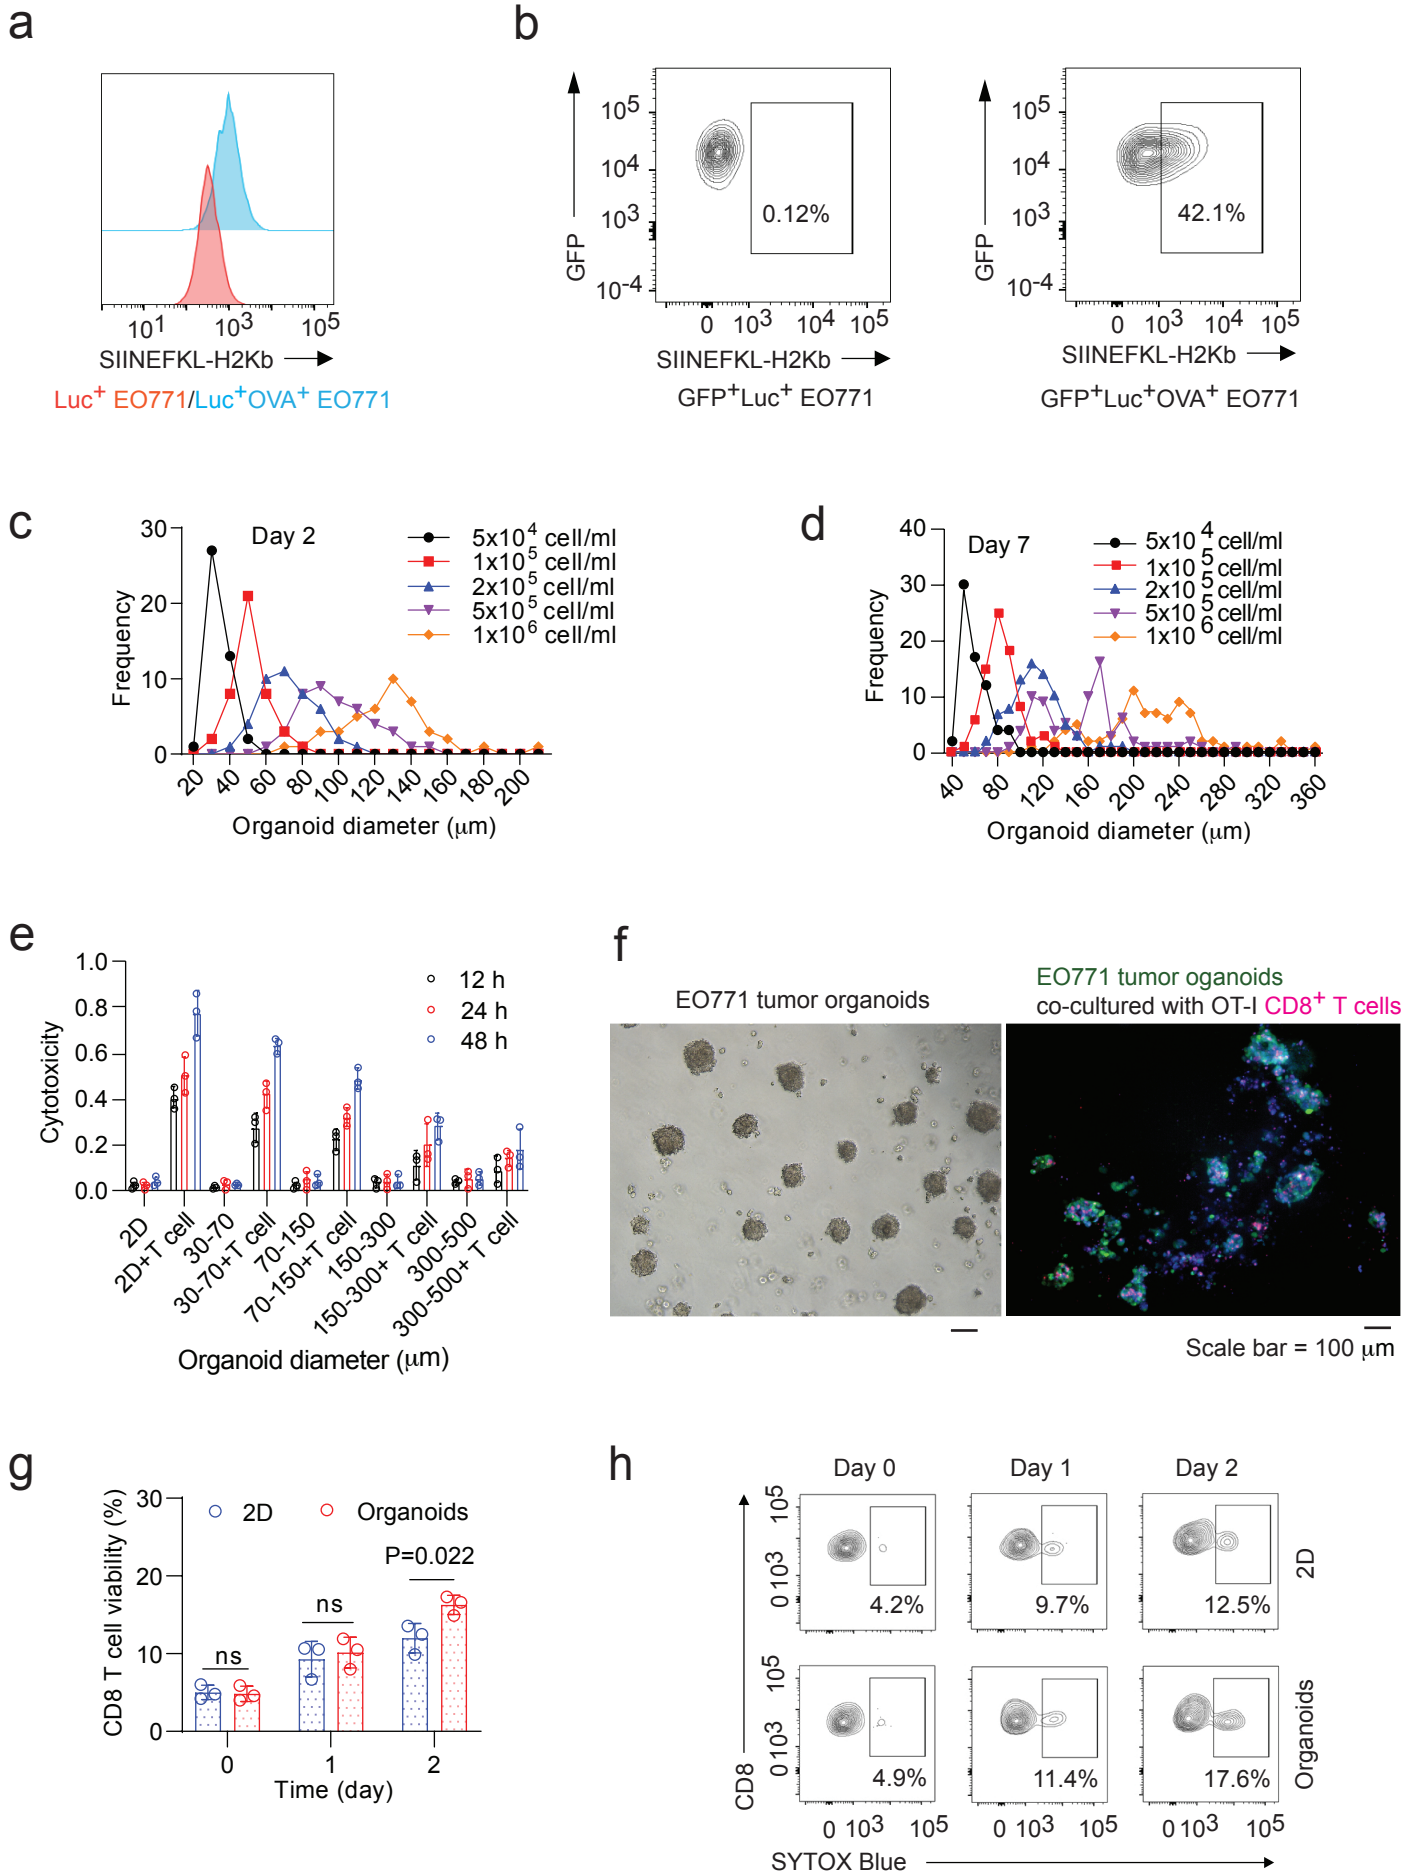

**Supplementary Fig. 1 | Characterization and optimization of EO771 tumour organoids.**

**a**, Levels of OVA antigen on EO771 and OVA<sup>+</sup> EO771 cells, determined by mean fluorescence intensity (MFI) in flow cytometry. **b**, Flow cytometry analysis showing OVA antigen levels on Luc<sup>+</sup>OVA<sup>+</sup> EO771 cells and GFP<sup>+</sup>Luc<sup>+</sup>OVA<sup>+</sup> EO771 cells. A total of 10,000 events per sample were collected. Doublets and dead cells were excluded from data analysis. **c,d**, Size distributions of EO771 tumour organoids with varying seeding cell concentrations and culture times. **e**, CD8<sup>+</sup> T cell-mediated cytotoxicity on mouse GFP<sup>+</sup>Luc<sup>+</sup>OVA<sup>+</sup> EO771 cells in 2D cell culture (with or without T cells) and 3D tumour organoids (with T cells) with different sizes for indicated culture time. Error bar indicates SD of three independent samples. **f**, Optical images showed EO771 tumour organoids with size of 70-150  $\mu\text{m}$  in diameter in culture.

Immunofluorescence images showed that EO771 tumour organoids were co-cultured with and without CD8<sup>+</sup> T cells from OT-I mice. EO771 tumour cells are visible in green colour (GFP<sup>+</sup>). CD8<sup>+</sup> T cells were stained with APC-conjugated anti-mouse CD8 and shown in red colour. **g**, The death proportions of OVA-specific CD8<sup>+</sup> T cells co-cultured with GFP<sup>+</sup>Luc<sup>+</sup>OVA<sup>+</sup> EO771 cells (2D) and GFP<sup>+</sup>Luc<sup>+</sup>OVA<sup>+</sup> EO771 tumour organoids. Two-way ANOVA test was used for data analysis (**g**). Data from three biologically parallel experiments are presented as mean  $\pm$  SD. ns, no significance. **h**, Representative flow cytometry data showing death proportions of OVA-specific CD8<sup>+</sup> T cells co-cultured with GFP<sup>+</sup>Luc<sup>+</sup>OVA<sup>+</sup> EO771 cells (2D) and GFP<sup>+</sup>Luc<sup>+</sup>OVA<sup>+</sup> EO771 tumour organoids. Death proportions of CD8<sup>+</sup> T cells were measured at day 0, 1 and 2. SYTOX Blue reagent was used to stain dead cells.

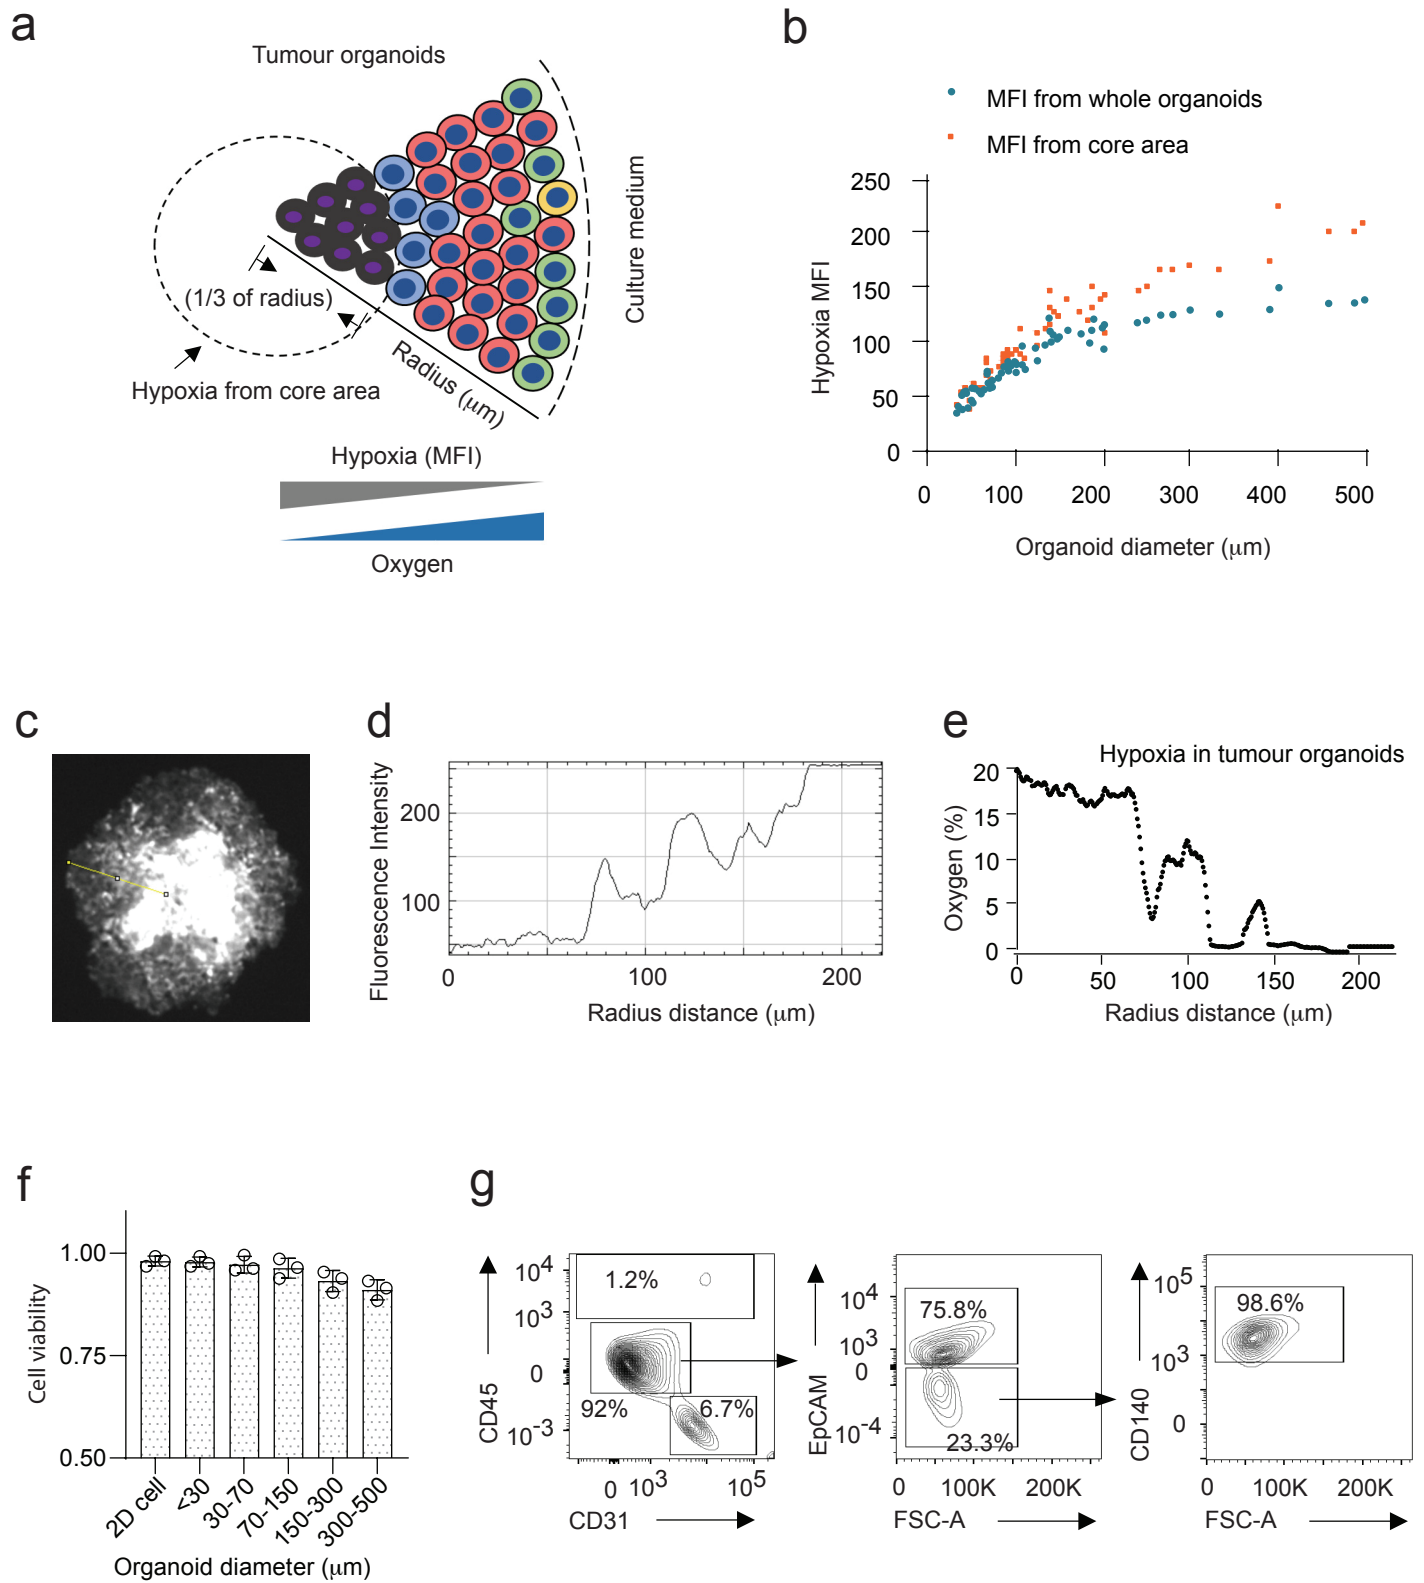

## **Supplementary Fig. 2 | Characterization of EO771 tumour organoids.**

**a**, Schematic illustration showing how hypoxia in tumour organoids was measured in our experiments. Specifically, the hypoxia-caused fluorescence intensity of the whole and core area of tumour organoids was quantified using ImageJ software after tumour organoids were stained by the Image-iT Green Hypoxia reagent and imaged under a Leica DM4B microscope. The core area was defined as the 1/3 of the inner part of the tumour organoids, which is more representative than the whole area for hypoxia in tumour organoids. The hypoxia-caused fluorescence intensity increases from surface to center of a tumour organoid due to the decreasing oxygen delivered from culture medium. **b**, Histogram of hypoxia-caused fluorescence intensity from tumour organoids, where the mean fluorescence intensity of the whole and core area of tumour organoids was measured. The fluorescence images without optical light were analyzed by ImageJ software to determine the fluorescence intensity. **c**, Typical image showing the hypoxia-caused fluorescence intensity from surface to center of a tumour organoid. **d**, The gradient line of the fluorescence intensity shown in (**c**), reflecting the hypoxia levels from the surface to the center of a tumour organoid. **e**, The oxygen levels of the core area of tumour organoids calculated from (**d**). **f**, Tumour cell viability in the EO771 tumour organoids with different sizes. **g**, The flow cytometry gating strategy for analysis of the cellular composition of tumour organoids.

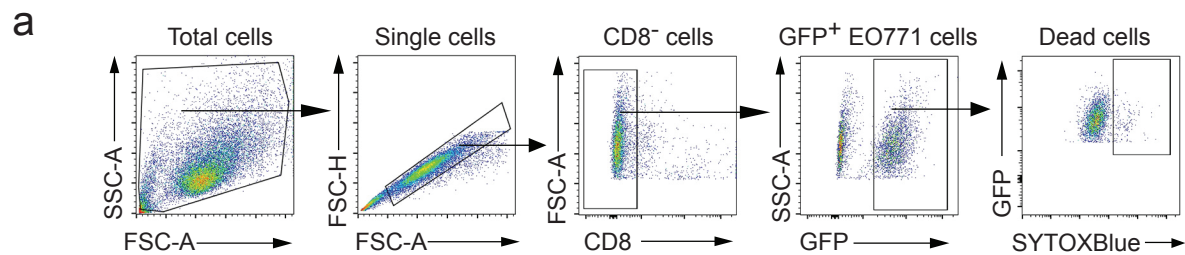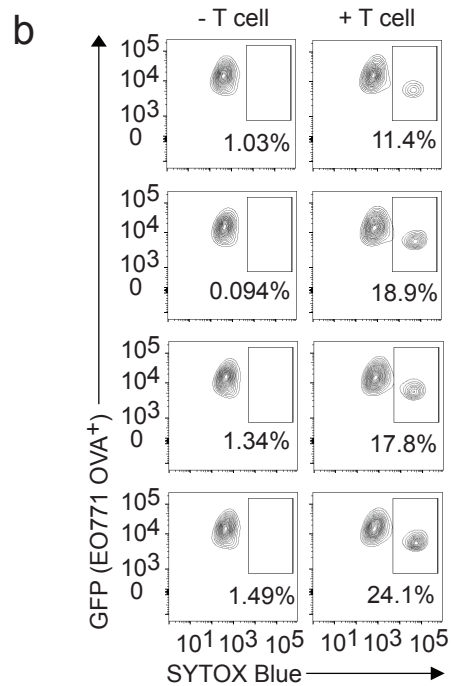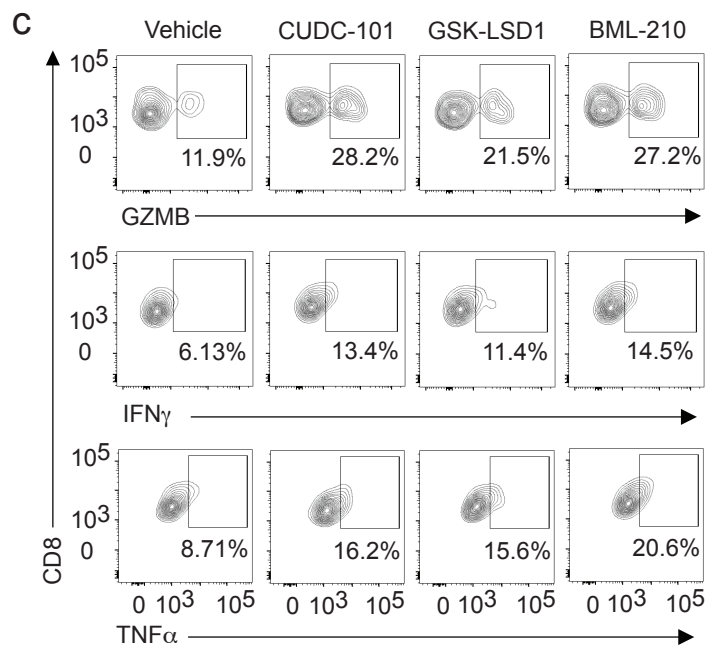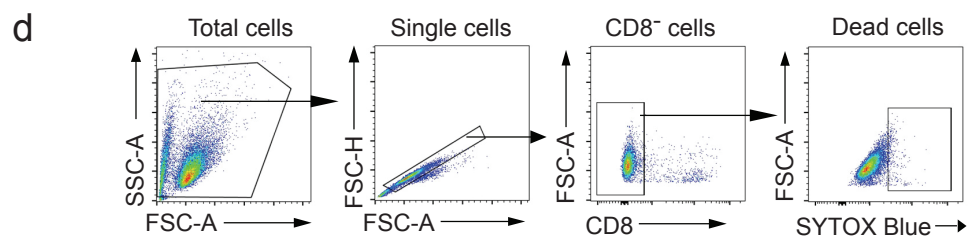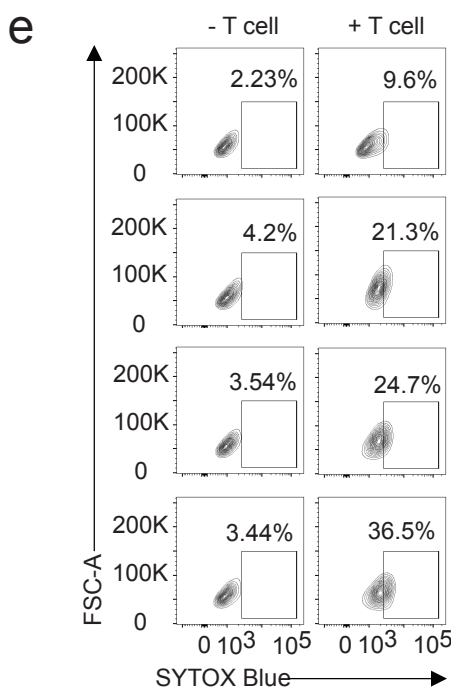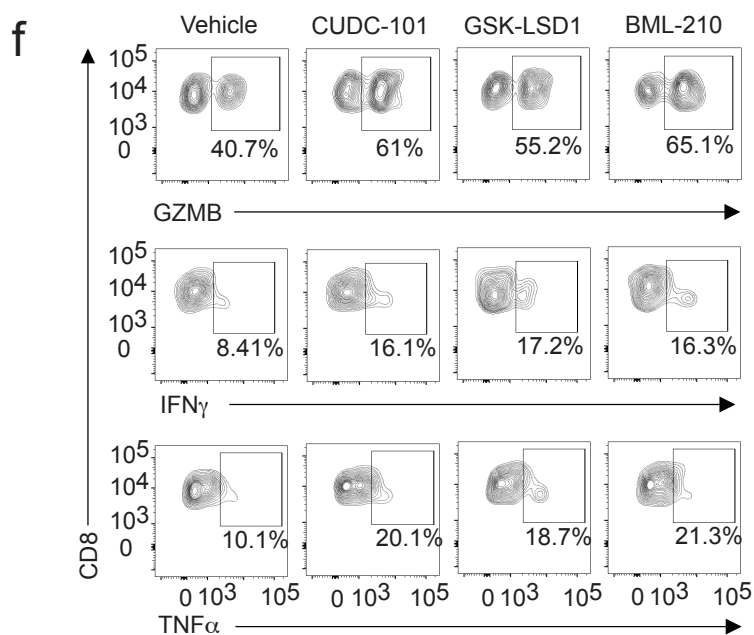

**Supplementary Fig. 3 | CD8<sup>+</sup> T cell cytotoxicity in the co-cultures with mouse and human tumour organoids.**

**a**, Flow cytometry gating strategy for the analysis of dead cells from GFP<sup>+</sup>Luc<sup>+</sup>OVA<sup>+</sup> EO771 tumour organoids. **b**, Representative flow cytometry data showing death proportion of GFP<sup>+</sup>Luc<sup>+</sup>OVA<sup>+</sup> EO771 tumour cells from the tumour organoids co-cultured with OVA-specific CD8<sup>+</sup> T cells. Tumour organoids were treated with drug in advance for 48 h and were then co-cultured with activated CD8<sup>+</sup> T cells (from OT-I mouse) for 24 h. SYTOX Blue was used to stain dead cells. **c**, Representative flow cytometry data showing active CD8<sup>+</sup> T cells in the co-culture with EO771 tumour organoids, indicated by positivity for GZMB, IFN $\gamma$  and TNF- $\alpha$ . **d**, Flow cytometry gating strategy for analysis of dead cells from NY-ESO-1<sup>+</sup> MDA-MB-468 tumour organoids. **e**, Representative flow cytometry data showing death proportion of NY-ESO-1<sup>+</sup> MDA-MB-468 cells from tumour organoids co-cultured with NY-ESO-1-specific CD8<sup>+</sup> T cells. **f**, Representative flow cytometry data showing active CD8<sup>+</sup> T cells in the co-culture with MDA-MB-468 tumour organoids, indicated by positivity for GZMB, IFN $\gamma$  and TNF- $\alpha$ . A total of 20,000 of events per cell sample were collected for flow cytometry analysis.

**a**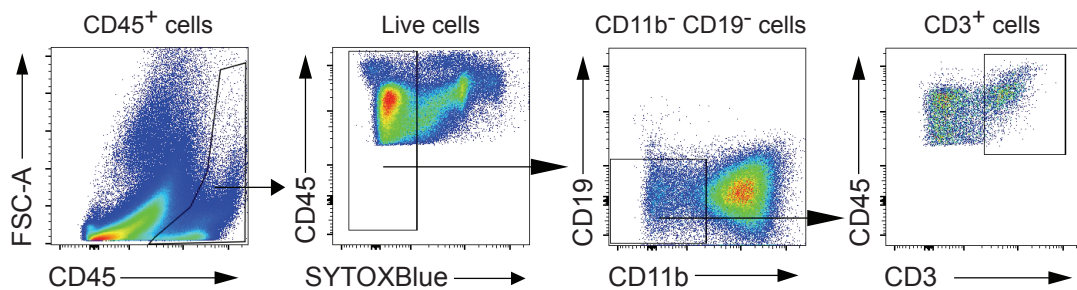**b**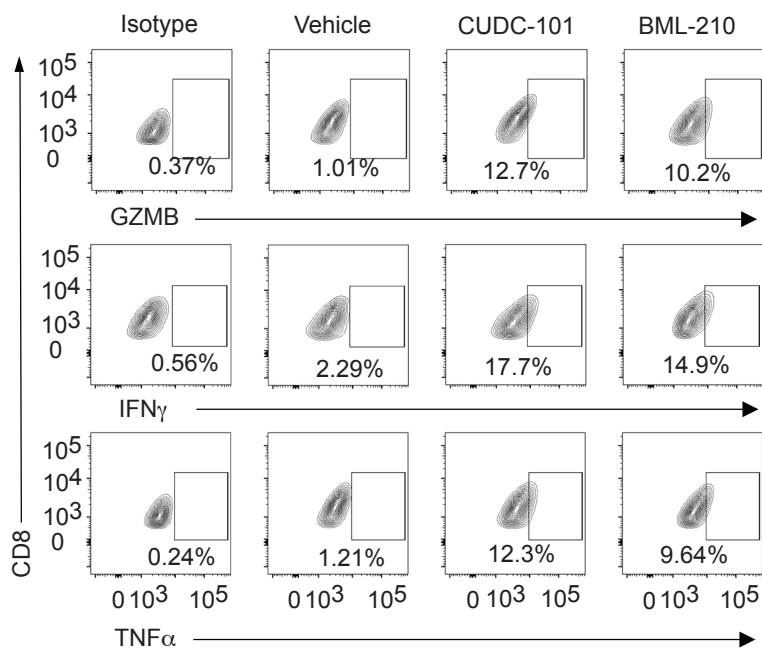**c**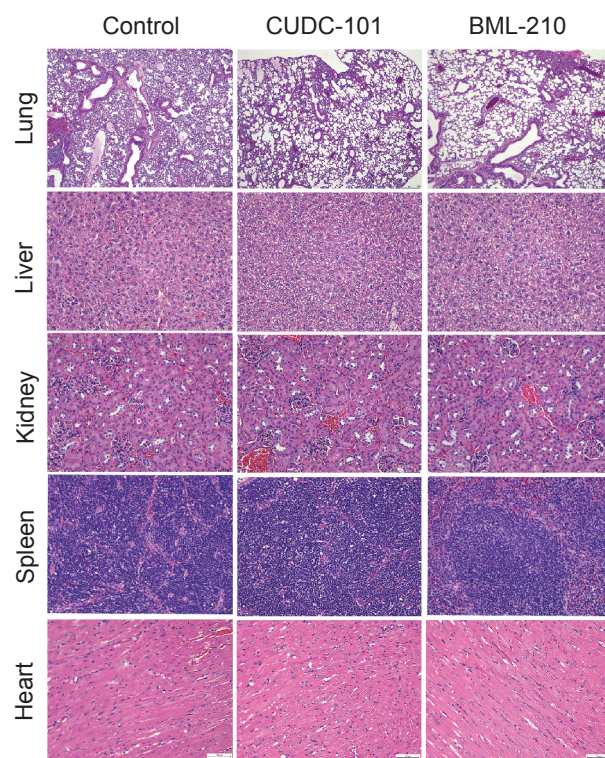Scale bar = 75  $\mu$ m**d**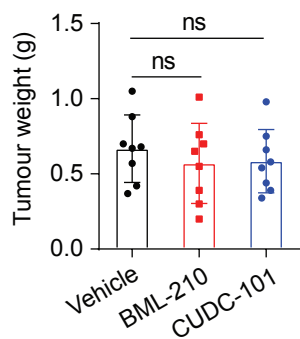



**Supplementary Fig. 4 | Anti-tumour effects of BML-210 and CUDC-101 in mouse breast tumour models**

**a**, Flow cytometry gating strategy for analysis of immune cells from EO771 tumours in C57BL/6 mice. **b**, Representative flow cytometry data showing active CD8<sup>+</sup> T cells in the EO771 tumours with vehicle control or drug treatment, indicated by positivity for GZMB, IFN $\gamma$  and TNF- $\alpha$ . **c**, H&E staining images of heart, spleen, kidney, liver and lung from the mice treated with vehicle control, BML-210 or CUDC-101. Sample slides were examined in blind by a professional pathologist. The conclusion is that no visible differences were observed between control and drug treatment groups. One million of events per cell sample were collected for flow cytometry analysis. **d**, Weight of the EO771 tumours from the tumour-bearing immunodeficient nude mice treated with vehicle control, BML-210 (20 mg kg<sup>-1</sup>), or CUDC-101 (20 mg kg<sup>-1</sup>). Tumours from immunodeficient mice were harvested at day 18 post injection. One-way ANOVA test was used for statistical analysis. Data are presented as mean  $\pm$  SD. ns, no significance.

**a**

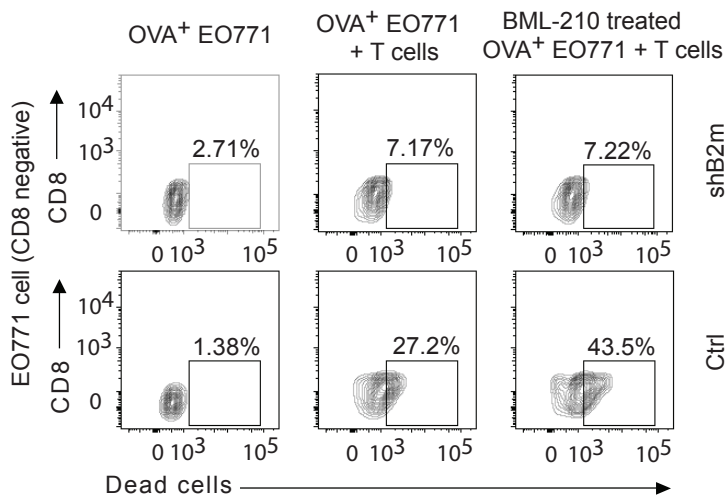

**b**

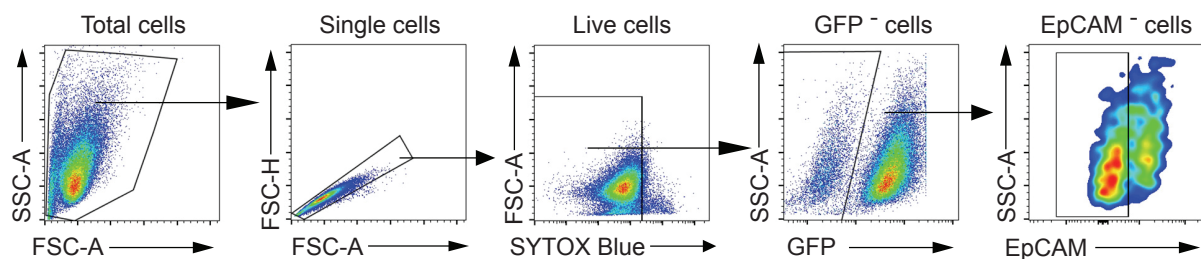

**c**

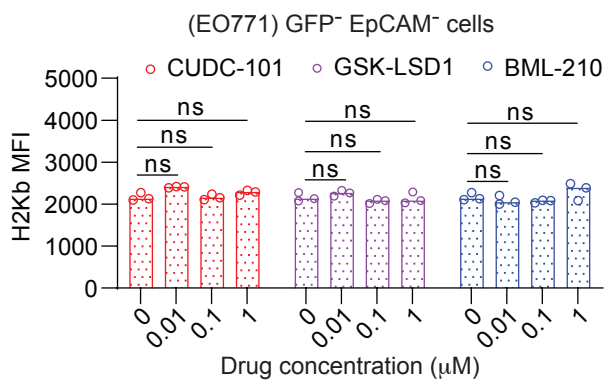

**d**

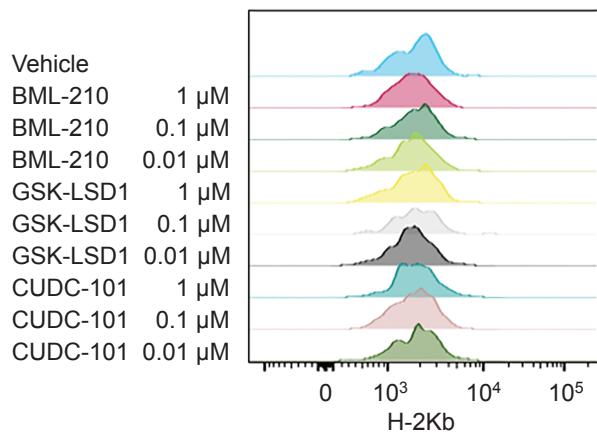

**Supplementary Fig. 5 | Drug candidates do not promote MHC-I associated antigen presentation of non-tumour cells from tumour organoids.**

**a**, Representative flow cytometry data showing the death proportion of the OVA<sup>+</sup> EO771 tumour cells with and without B2M shRNA knockdown in the tumour organoids. Data from 3 biologically parallel experiments were analyzed using one-way ANOVA and presented as mean  $\pm$  SD. **b**, Flow cytometry gating strategy for the analysis of GFP<sup>-</sup>EPCAM<sup>-</sup> cells from GFP<sup>+</sup>Luc<sup>+</sup>OVA<sup>+</sup> EO771 tumour organoids. **c**, Quantitative analysis of H-2Kb levels on the non-tumour cells (GFP<sup>-</sup>EpCAM<sup>-</sup>) cells from the GFP<sup>+</sup>Luc<sup>+</sup>OVA<sup>+</sup> EO771 tumour organoids treated with drug candidates. Data from 3 biologically parallel experiments were analyzed using Two-way ANOVA and presented as mean  $\pm$  SD. ns, no significance. **d**, Representative flow cytometry data showing H-2Kb levels on the non-tumour cells (GFP<sup>-</sup>EpCAM<sup>-</sup>) cells from the GFP<sup>+</sup>Luc<sup>+</sup>OVA<sup>+</sup> EO771 tumour organoids treated with drug candidates.

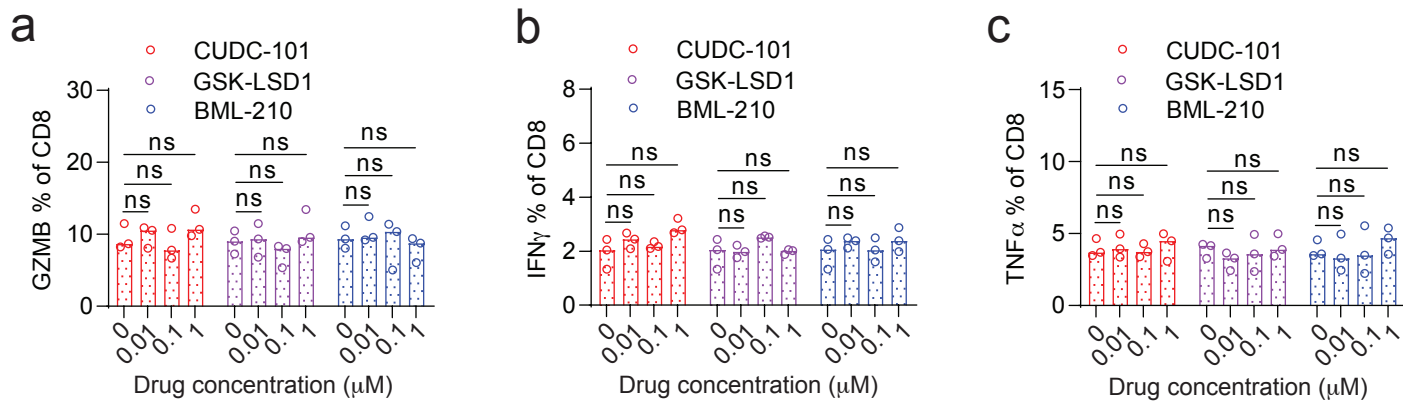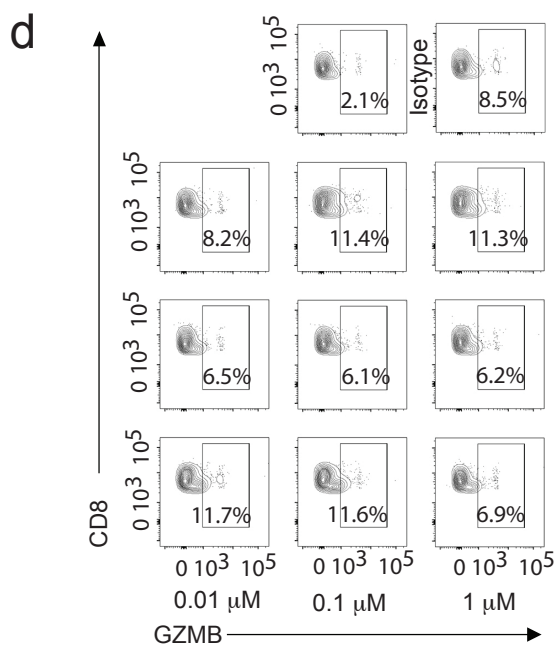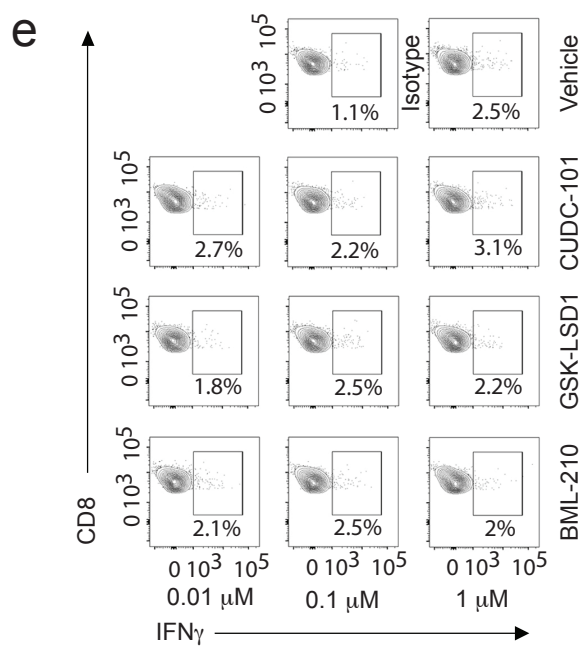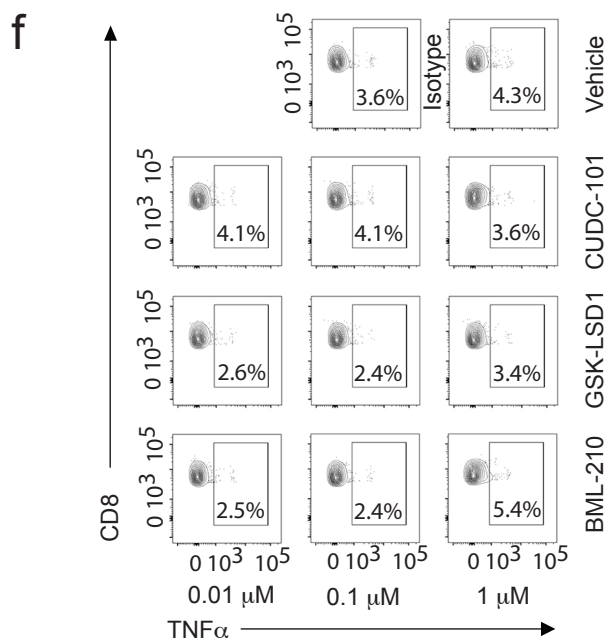

**Supplementary Fig. 6 | Drug candidates do not directly affect cytokine expression levels in CD8<sup>+</sup> T cells.**

**a-c**, GZMB (**a**), IFN $\gamma$  (**b**) and TNF- $\alpha$  (**c**) expression levels in the CD8<sup>+</sup> T cells treated with CUDC-101, GSK-LSD1 or BML-210 at indicated concentrations. CD8<sup>+</sup> T cells were isolated from the spleen of OT-I transgenic mouse. **d-f**, Representative flow cytometry data showing GZMB (**a**), IFN $\gamma$  (**b**) and TNF- $\alpha$  (**c**) expression levels in the CD8<sup>+</sup> T cells. Data (**a-c**) from three biologically parallel experiments were analyzed using Two-way ANOVA and presented as mean  $\pm$  SD. ns, no significance.

**a**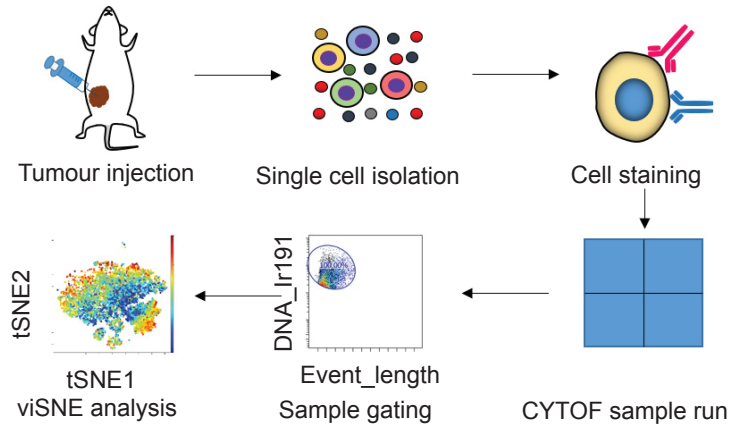

Mass cytometry analysis of immune cells in the tumour

**b**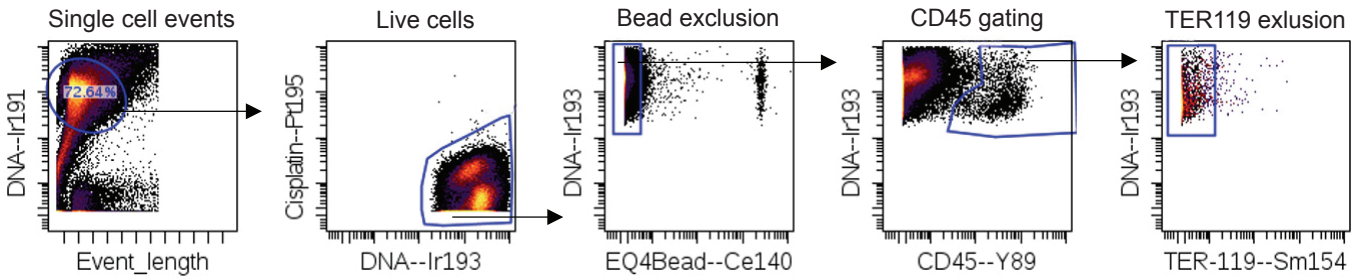**c**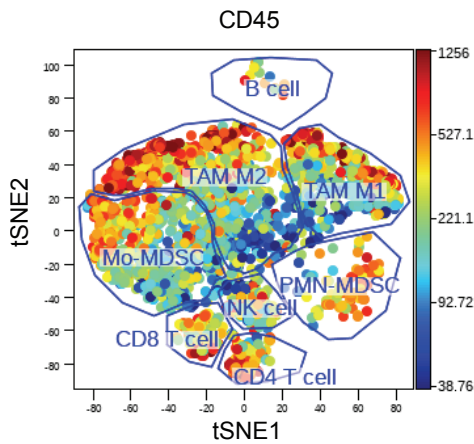**d**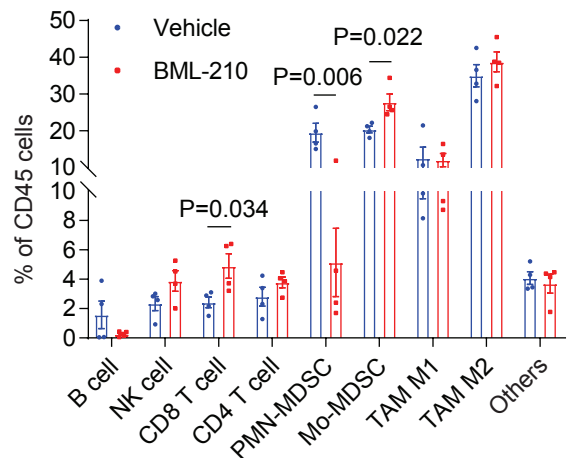

**Supplementary Fig. 7 | Mass cytometry (CyTOF) analysis of immune cell profiles in EO771 tumours upon BML-210 treatment.**

**a**, CyTOF gating strategy for immune cells in EO771 tumours harvested from the tumour-bearing C57BL/6 mice with and without BML-210 drug treatment. A panel of 26 antibodies were used for CyTOF analysis (**Supplementary Table 2**). The data were analyzed using viSNE in the Cytobank platform. **b**, Gating Strategy for immune cells in EO771 tumours before the viSNE analysis. **c**, The different immune cell subtypes displayed in tSNE plot. **d**, The proportion of different immune cell subtypes in the control and BML-210-treated breast tumours, determined by viSNE analysis. Data were analyzed using Two-way ANOVA and presented as mean  $\pm$ .

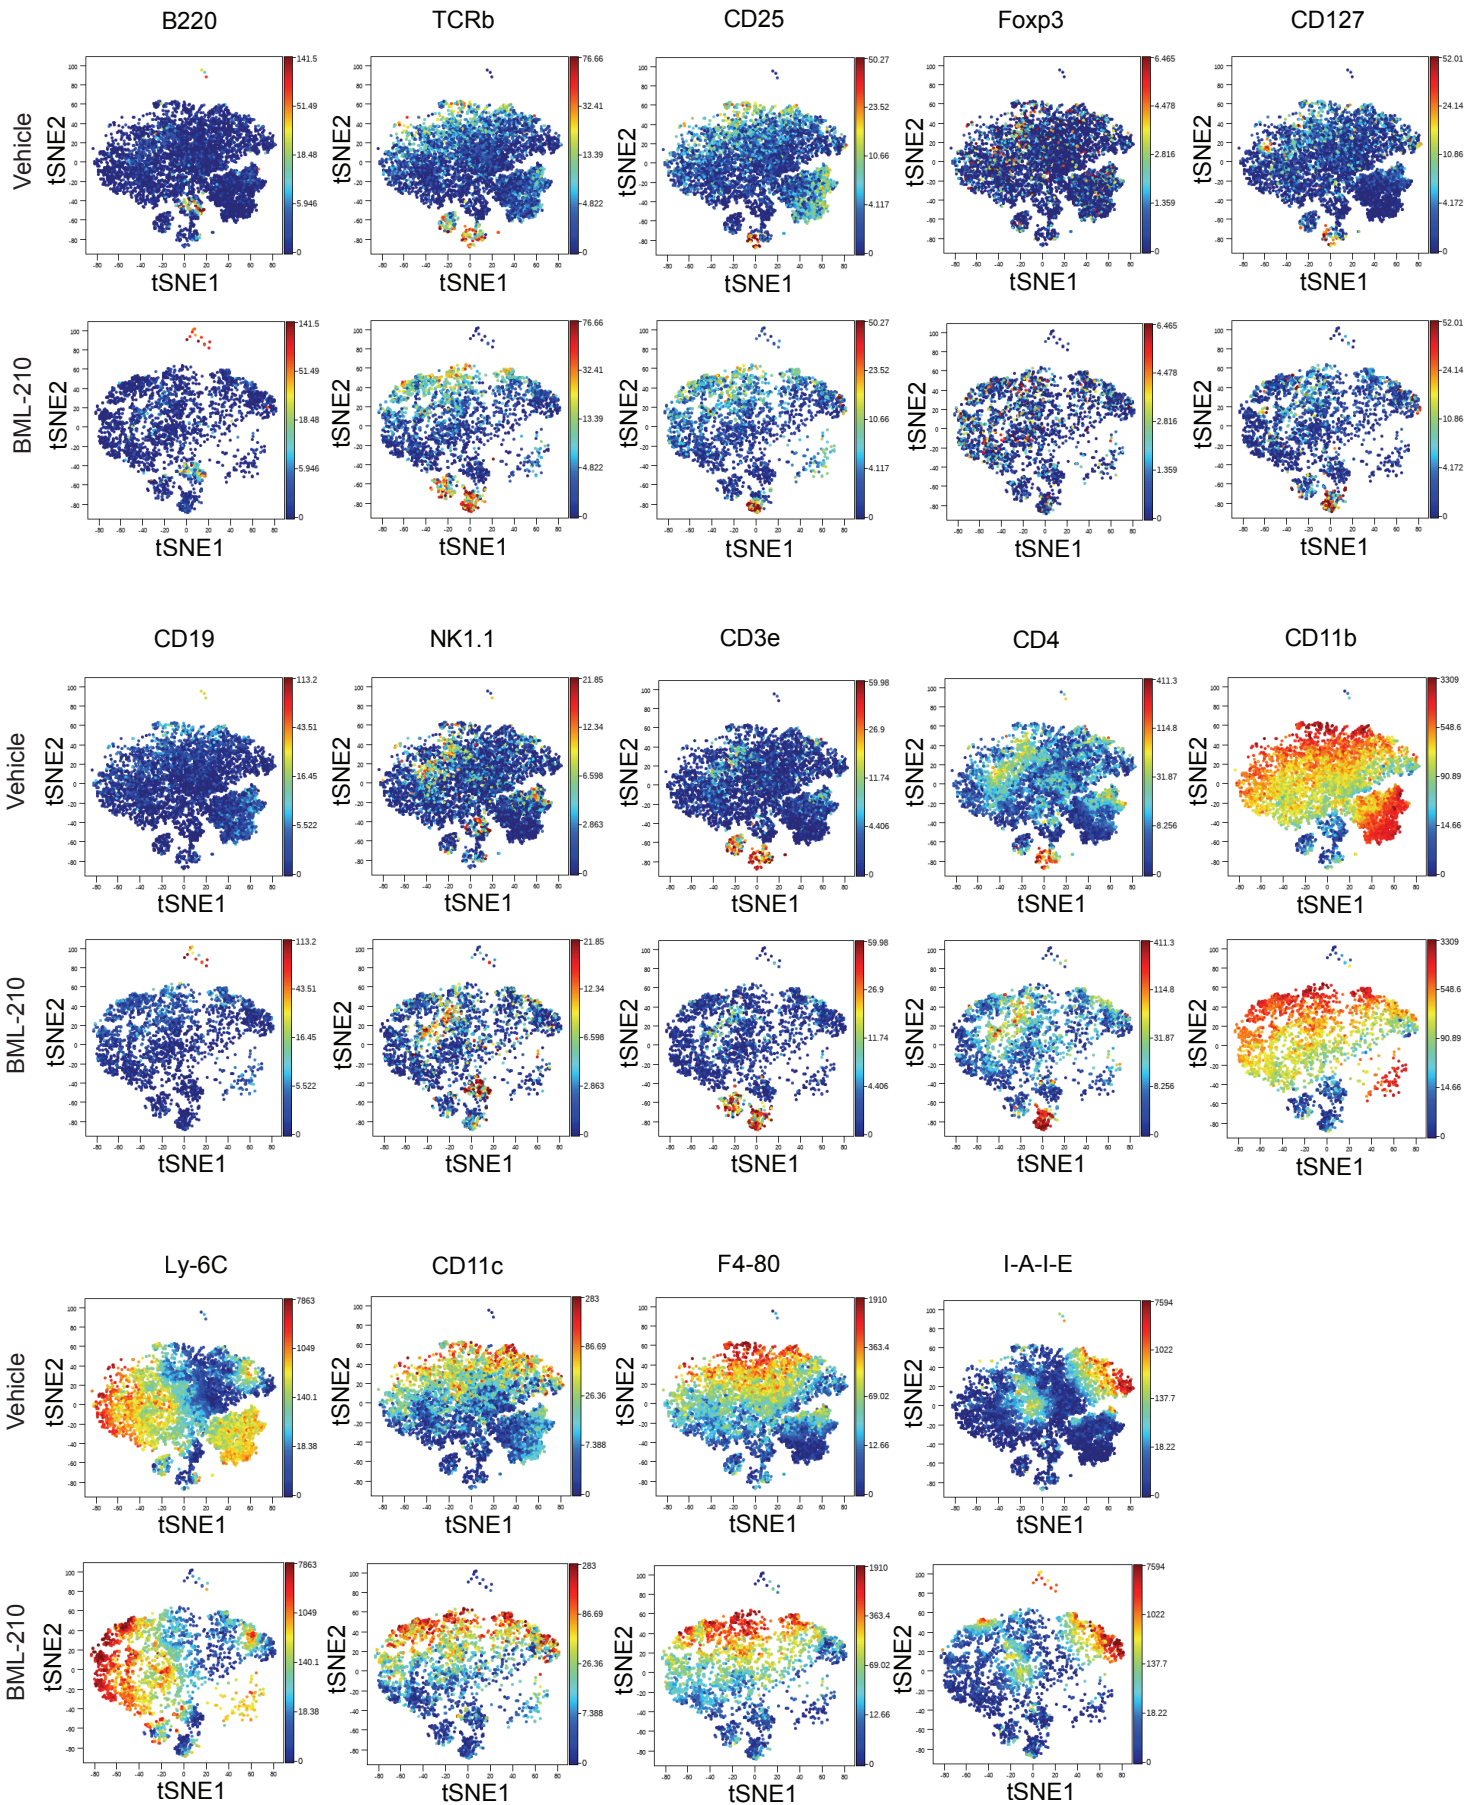



**Supplementary Fig. 8 | Mass cytometry (CyTOF) single channel plots of immune cell profiles in EO771 tumours upon BML-210 treatment.**

tSNE representation of immune cell subtypes in the EO771 tumours with control or BML-210 treatment, analyzed by viSNE analysis via the Cytobank platform.

**a**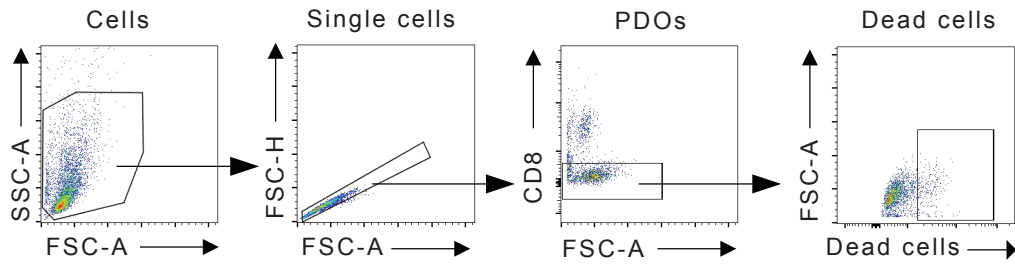**b**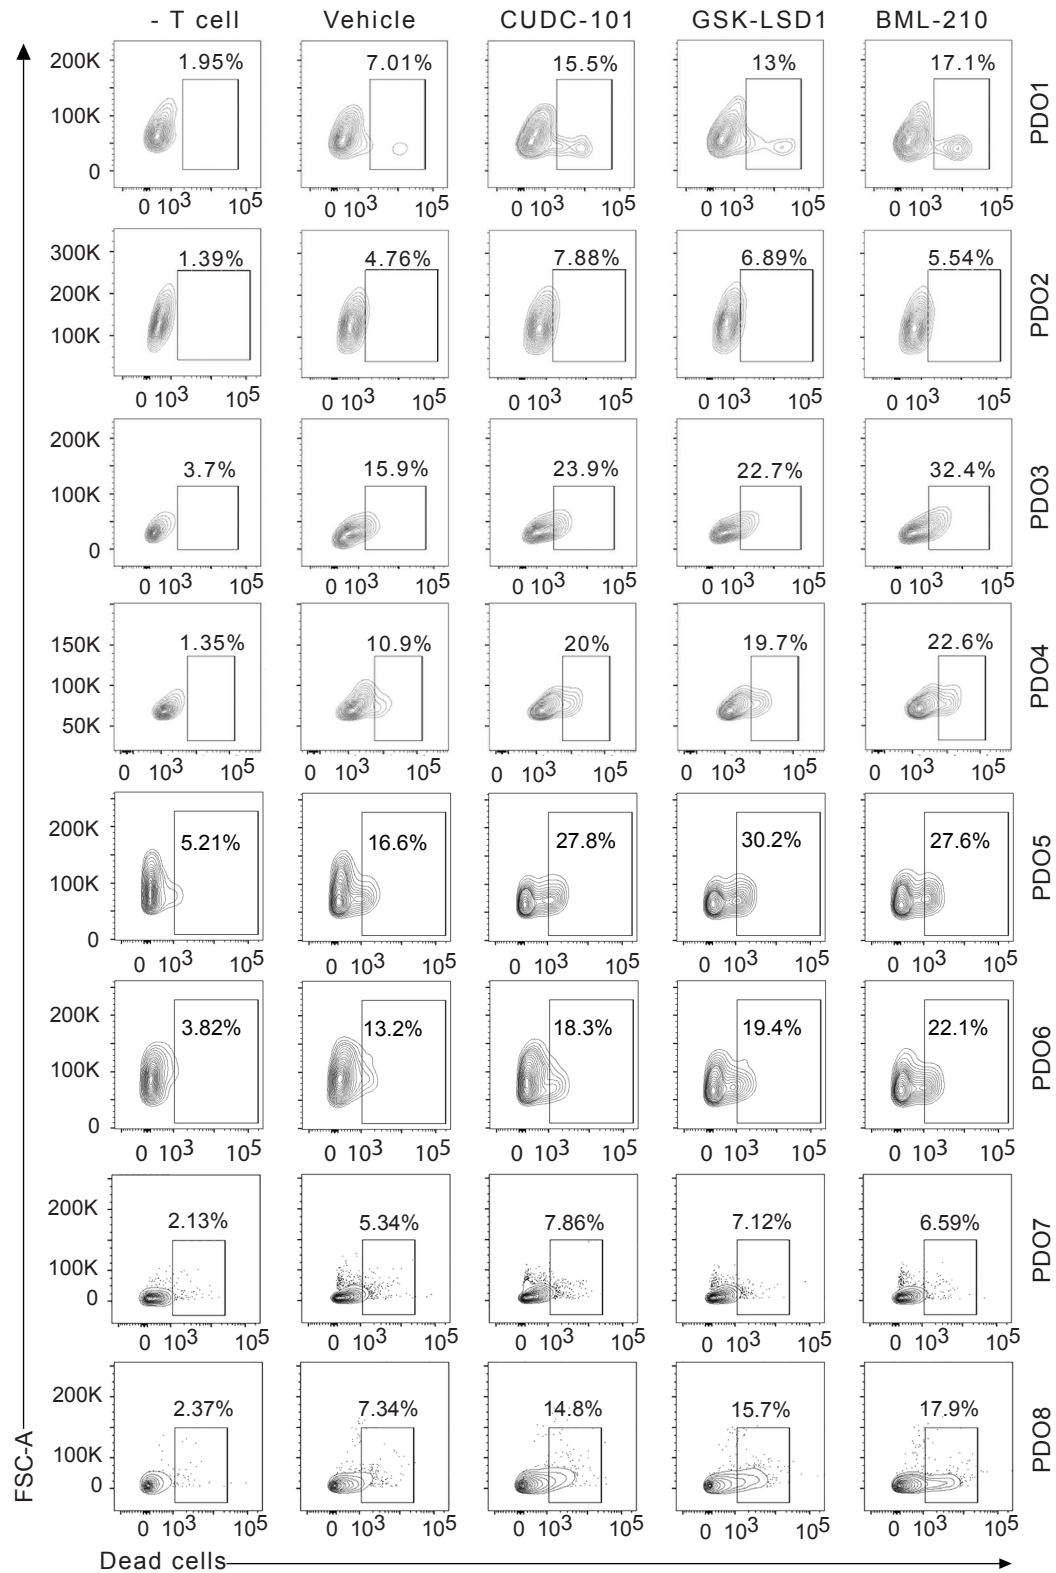

**Supplementary Fig. 9 | The effect of drug treatment on the cytotoxicity of autologous CD8<sup>+</sup> T cell on patient-derived breast tumour organoids.**

**a**, Flow cytometry gating strategy for dead tumour cells in PDOs killed by CD8<sup>+</sup> T cells. **b**, Representative flow cytometry data showing the death proportion of tumour cells in CUDC-101, GSK-LSD1 and BML-210 treated PDOs. PDO1-8 refers to 8 PDOs generated from fresh breast tumour tissue samples from 8 patients.

**Supplementary Table 1. Epigenetic inhibitors library (Cayman Chemical)**

Item No.11076; Batch No. 0522205

| <b>NUMBER</b> | <b>DRUG NAME</b>                     | <b>CATALOG</b> |
|---------------|--------------------------------------|----------------|
| 1             | (+)-Abscisic Acid                    | 10073          |
| 2             | 3-amino Benzamide                    | 10397          |
| 3             | SB939                                | 10443          |
| 4             | PCI 34051                            | 10444          |
| 5             | 4-iodo-SAHA                          | 10495          |
| 6             | Sirtinol                             | 10523          |
| 7             | C646                                 | 10549          |
| 8             | Tubastatin A (trifluoroacetate salt) | 10559          |
| 9             | Garcinol                             | 10566          |
| 10            | Ellagic Acid                         | 10569          |
| 11            | Scriptaid                            | 10572          |
| 12            | Apicidin                             | 10575          |
| 13            | HC Toxin                             | 10576          |
| 14            | UNC0321 (trifluoroacetate salt)      | 10582          |
| 15            | (-)-Neplanocin A                     | 10584          |
| 16            | Cl-Amidine (trifluoroacetate salt)   | 10599          |
| 17            | F-Amidine (trifluoroacetate salt)    | 10610          |
| 18            | JGB1741                              | 10641          |
| 19            | coumarin-SAHA                        | 10671          |
| 20            | I-BET762                             | 10676          |
| 21            | UNC0638                              | 10734          |
| 22            | Phthalazinone pyrazole               | 10735          |
| 23            | Isoliquiritigenin                    | 10739          |
| 24            | CCG-100602                           | 10787          |
| 25            | CAY10669                             | 10974          |
| 26            | Zebularine                           | 10975          |
| 27            | Delphinidin (chloride)               | 11012          |
| 28            | ITF 2357                             | 11045          |
| 29            | UNC0631                              | 11084          |
| 30            | UNC0646                              | 11085          |
| 31            | Methylstat (hydrate)                 | 11091          |
| 32            | 3-Deazaneplanocin A (hydrochloride)  | 11102          |
| 33            | Suramin (sodium salt)                | 11126          |
| 34            | Nicotinamide                         | 11127          |
| 35            | 2,4-Pyridinedicarboxylic Acid        | 11138          |
| 36            | PFI-1                                | 11155          |
| 37            | 5-Azacytidine                        | 11164          |
| 38            | SGI-1027                             | 11165          |
| 39            | Decitabine                           | 11166          |

|    |                                  |       |
|----|----------------------------------|-------|
| 40 | I-BET151                         | 11181 |
| 41 | (+)-JQ1                          | 11187 |
| 42 | (-)-JQ1                          | 11232 |
| 43 | BSI-201                          | 11304 |
| 44 | 1-Naphthoic Acid                 | 11322 |
| 45 | Sodium 4-Phenylbutyrate          | 11323 |
| 46 | Rucaparib (phosphate)            | 11570 |
| 47 | IOX1                             | 11572 |
| 48 | MI-2 (hydrochloride)             | 11620 |
| 49 | MI-nc (hydrochloride)            | 11621 |
| 50 | Gemcitabine                      | 11690 |
| 51 | Lomeguatrib                      | 11732 |
| 52 | GSK4112                          | 11931 |
| 53 | Octyl- $\alpha$ -ketoglutarate   | 11970 |
| 54 | Daminozide                       | 12033 |
| 55 | GSK-J1 (sodium salt)             | 12054 |
| 56 | GSK-J2 (sodium salt)             | 12056 |
| 57 | GSK-J4 (hydrochloride)           | 12073 |
| 58 | CI-994                           | 12084 |
| 59 | CPTH2 (hydrochloride)            | 12086 |
| 60 | Etoposide                        | 12092 |
| 61 | Lestaurtinib                     | 12094 |
| 62 | Butyrolactone 3                  | 12095 |
| 63 | Valproic Acid (sodium salt)      | 13033 |
| 64 | Tenovin-1                        | 13085 |
| 65 | Tenovin-6                        | 13086 |
| 66 | Sodium Butyrate                  | 13121 |
| 67 | BIX01294 (hydrochloride hydrate) | 13124 |
| 68 | Anacardic Acid                   | 13144 |
| 69 | AGK2                             | 13145 |
| 70 | CAY10603                         | 13146 |
| 71 | Splitomicin                      | 13168 |
| 72 | CBHA                             | 13172 |
| 73 | M 344                            | 13174 |
| 74 | Oxamflatin                       | 13176 |
| 75 | Salermide                        | 13178 |
| 76 | Mirin                            | 13208 |
| 77 | Pimelic Diphenylamide 106        | 13212 |
| 78 | KD 5170                          | 13214 |
| 79 | Panobinostat                     | 13280 |
| 80 | MS-275                           | 13284 |
| 81 | HNHA                             | 13295 |
| 82 | RG-108                           | 13302 |
| 83 | 2',3',5'-triacetyl-5-Azacytidine | 13373 |

|     |                                              |       |
|-----|----------------------------------------------|-------|
| 84  | S-Adenosylhomocysteine                       | 13603 |
| 85  | UNC0224                                      | 13631 |
| 86  | Chidamide                                    | 13686 |
| 87  | Tubacin                                      | 13691 |
| 88  | 3-Deazaneplanocin A                          | 13828 |
| 89  | Sinefungin                                   | 13829 |
| 90  | Pyroxamide                                   | 13870 |
| 91  | N-Oxalylglycine                              | 13944 |
| 92  | WDR5-0103                                    | 13945 |
| 93  | EPZ005687                                    | 13966 |
| 94  | SGC0946                                      | 13967 |
| 95  | UNC1215                                      | 13968 |
| 96  | AK-7                                         | 14004 |
| 97  | GSK343                                       | 14094 |
| 98  | Bromosporine                                 | 14119 |
| 99  | GSK2801                                      | 14120 |
| 100 | SIRT1/2 Inhibitor IV                         | 14407 |
| 101 | I-CBP112 (hydrochloride)                     | 14468 |
| 102 | SGC-CBP30                                    | 14469 |
| 103 | UNC0642                                      | 14604 |
| 104 | UNC1999                                      | 14621 |
| 105 | I-PFI-2 (hydrochloride)                      | 14678 |
| 106 | HPOB                                         | 15066 |
| 107 | 2-hexyl-4-Pentynoic Acid                     | 15205 |
| 108 | PFI-3                                        | 15267 |
| 109 | JIB-04                                       | 15338 |
| 110 | CAY10683                                     | 15403 |
| 111 | GSK126                                       | 15415 |
| 112 | CPI-203                                      | 15479 |
| 113 | 6-Thioguanine                                | 15774 |
| 114 | Tubastatin A                                 | 15785 |
| 115 | 3,3'-Diindolylmethane                        | 15927 |
| 116 | OTX015                                       | 15947 |
| 117 | 5-Methylcytidine                             | 16111 |
| 118 | AGK7                                         | 16152 |
| 119 | 5-Methyl-2'-deoxycytidine                    | 16166 |
| 120 | EPZ5676                                      | 16175 |
| 121 | MC 1568                                      | 16265 |
| 122 | $\alpha$ -Hydroxyglutaric Acid (sodium salt) | 16374 |
| 123 | S-(5'-Adenosyl)-L-methionine (tosylate)      | 16376 |
| 124 | RVX-208                                      | 16424 |
| 125 | CUDC-101                                     | 16426 |
| 126 | LAQ824                                       | 16427 |
| 127 | Nullscript                                   | 16433 |

|     |                           |          |
|-----|---------------------------|----------|
| 128 | GSK-LSD1 (hydrochloride)  | 16439    |
| 129 | RGFP966                   | 16917    |
| 130 | BRD73954                  | 16919    |
| 131 | <i>trans</i> -Resveratrol | 70675    |
| 132 | DMOG                      | 71210    |
| 133 | Trichostatin A            | 89730    |
| 134 | CAY10398                  | 89740    |
| 135 | RSC-133                   | 9001839  |
| 136 | BML-210                   | 10005019 |
| 137 | Piceatannol               | 10009366 |
| 138 | CAY10591                  | 10009797 |
| 139 | EX-527                    | 10009798 |
| 140 | SAHA                      | 10009929 |
| 141 | 2-PCPA (hydrochloride)    | 10010494 |

**Supplementary Table 2. Antibody panel for CyTOF analysis**

|    | <b>Marker</b> | <b>Clone</b> | <b>Tag</b>        | <b>Cat. #</b> | <b>Sample (µl)</b> |
|----|---------------|--------------|-------------------|---------------|--------------------|
| 1  | CD45          | 30- F11      | 89Y               | 3089005B      | 0.25               |
| 2  | I-A/I-E       | M5/114.15.2  | 209Bi             | 3209006B      | 0.5                |
| 3  | CD274/PD-L1   | 10F.9G2      | 153Eu             | 3153016B      | 0.25               |
| 4  | CD3e          | 145-2C11     | 152Sm             | 3152004B      | 0.25               |
| 5  | CD8a          | 53-6.7       | 146Nd             | 3146003B      | 0.5                |
| 6  | CD25          | 3C7          | 150Nd             | 3150002B      | 0.25               |
| 7  | CD127/IL7Ra   | A7R34        | 175Lu             | 3175006B      | 0.5                |
| 8  | CD62L         | MEL-14       | 160Gd             | 3160008B      | 0.17               |
| 9  | CD69          | H1.2F3       | 145Nd             | 3145005B      | 0.5                |
| 10 | TCRb          | H57-597      | 143Nd             | 3143010B      | 0.5                |
| 11 | CD44          | IM7          | 171Yb             | 3171003B      | 0.2                |
| 12 | CD11b         | M1/70        | 148Nd             | 3148003B      | 0.17               |
| 13 | CD11c         | N418         | 142 <sup>Nd</sup> | 3142003B      | 0.5                |
| 14 | F4/80         | BM8          | 159Tb             | 3159009B      | 0.25               |
| 15 | Ly-6C         | HK1.4        | 162Dy             | 3162014B      | 0.2                |
| 16 | Ly-6G         | 1A8          | 141Pr             | 3141008B      | 0.5                |
| 17 | NK1.1         | PK136        | 170Er             | 3170002B      | 0.5                |
| 18 | CD45R/ B220   | RA3-6B2      | 176Yb             | 3176002B      | 0.5                |
| 19 | CD19          | 6D5          | 149Sm             | 3149002B      | 0.5                |
| 20 | TER-119       | TER-119      | 154Sm             | 3154005B      | 0.25               |
| 21 | EpCAM         | G8.8         | 166Er             | 3166014B      | 0.25               |
| 22 | Vimentin      | RV202        | 156Gd             | 315602A       | 0.25               |
| 23 | CCR7          | 4B12         | 164Dy             | 3164013A      | 0.25               |
| 24 | LAG3          | C9B7W        | 174Yb             | 3174019B      | 0.25               |
| 25 | CD4           | RM4-5        | 172Yb             | 3172003B      | 0.5                |
| 26 | CD206         | C068C2       | 169Tm             | 3169021B      | 0.25               |



**Supplementary Table 3. Clinical information of human breast cancer samples.**

| <b>Patient samples</b> | <b>Sex</b> | <b>Age</b> | <b>Surgery</b>     | <b>Diagnosis</b>                                    |
|------------------------|------------|------------|--------------------|-----------------------------------------------------|
| 1                      | F          | 61         | mastectomy         | Papillary carcinoma                                 |
| 2                      | F          | 34         | mastectomy         | Inflammatory breast cancer                          |
| 3                      | F          | 34         | mastectomy         | Triple negative breast cancer                       |
| 4                      | F          | 62         | mastectomy         | Invasive ductal carcinoma (ER+)                     |
| 5                      | F          | 68         | mastectomy         | Invasive ductal carcinoma (ER/PR +, HER2-)          |
| 6                      | F          | 85         | mastectomy         | Invasive ductal carcinoma (ER/PR+, HER2 equivocal ) |
| 7                      | F          | 48         | mastectomy         | Invasive ductal carcinoma (TNBC)                    |
| 8                      | F          | 55         | mastectomy         | Invasive ductal carcinoma (ER+, PR-, HER2-)         |
| 9                      | F          | 65         | mastectomy         | Invasive ductal carcinoma (ER+, PR+, HER2-)         |
| 10                     | F          | 59         | Partial mastectomy | Recurrent invasive ductal carcinoma (ER+/PR+)       |

**Supplementary Table 4. Mouse breast tumour organoid culture medium**

| Products | Name                               | Company       | Catalog #    | Concentration |
|----------|------------------------------------|---------------|--------------|---------------|
| 1        | GlutaMAX Supplement                | Thermo Fisher | 35050061     | 1x            |
| 2        | B-27™ Supplement (50X), serum free | Sigma         | 17504044     | 1x            |
| 3        | N-acetyl-L-cysteine                | Sigma         | A7250-5G     | 1 mM          |
| 4        | Recombinant murine EGF             | PeproTech     | 315-09       | 5 µg/ml       |
| 5        | R spondin-1                        | Sigma         | SRP6487-10UG | 0.5 µg/ml     |
| 6        | Noggin                             | PeproTech     | 120-10C      | 0.1 µg/ml     |
| 7        | FGF10                              | Biologend     | 751004       | 10 ng/ml      |
| 8        | Recombinant murine FGF             | Sigma         | PMG0034      | 5 ng/ml       |
| 9        | A 83-01                            | Tocris        | 2939         | 500 nM        |
| 10       | SB 202190                          | Sigma         | S7067        | 10 µM         |
| 11       | Penicillin/Streptomycin            | Corning       | 30-002-CI    | 1:100         |
| 12       | Fetal bovine serum                 | Sigma         | 12103C-500ML | 10%           |
| 13       | DMEM/F12                           | Corning       | 10092CM      | 500 ml        |

**Supplementary Table 5. RT-qPCR Primers**

| Mouse primers |                              | Human primers |                              |
|---------------|------------------------------|---------------|------------------------------|
| Primer Name   | Sequence 5' to 3'            | Primer Name   | Sequence 5' to 3'            |
| B2m qF        | TTCTGGTGCTTGTCTCACTGA        | B2M qF        | GAGGCTATCCAGCGTACTCCA        |
| B2m qR        | CAGTATGTTTCGGCTTCCCATTG      | B2M qR        | CGGCAGGCATACTCATCTTTT        |
| Calr qF       | TGGCTGCTCCCAATAATGTCT        | CALR qF       | CCTGCCGTCTACTTCAAGGAG        |
| Calr qR       | GAGGGTAGTGACCAAAAGATG<br>G   | CALR qR       | GAACTTGCCGGAAGTGAAGAAC       |
| Itgav qF      | CCGTGGACTTCTTCGAGCC          | ITGAV qF      | ATCTGTGAGGTGCAAACAGGA        |
| Itgav qR      | CTGTTGAATCAAACCTCAATGGG<br>C | ITGAV qR      | TGGAGCATACTCAACAGTCTTT<br>G  |
| Sec22b qF     | CTGACGATGATCGCCCGTG          | CTSV qF       | CGTGACGCCAGTGAAGAATCA        |
| Sec22b qR     | TGCTTAGCCTGACTCTGATACT<br>G  | CTSV qR       | CGCTCAGTGAGACAAGTTTCC        |
| Sec23a qF     | AGATGGGGTCCGGTTCAGTT         | SEC22B qF     | CCGGGACCTTCAACAATATCA<br>G   |
| Sec23aqR      | GGTAGGTCGGGTCTCTCCTT         | SEC22B qR     | GCAAAGCCAAGTCTTAGGG<br>A     |
| Sec24a qF     | TCCTGTCCACAATACACTGATG<br>T  | SEC23A qF     | GGAGTCCGATTTAGTTGGAAT<br>GT  |
| Sec24a qR     | GAACCACCGTAGTTCGACTGT        | SEC23A qR     | AGGTCTCTCTTTCAGTGGTGT        |
| Sec24c qF     | CTGGCCGGAATGCAGATCAG         | SEC24A qF     | ATGTCCCAGCCGGAATAC           |
| Sec24c qR     | TGAGGATAGGAGCCGATGGA         | SEC24A qR     | AGGACCGTTGGTGTAGGGAG         |
| Sec24d qF     | GGAGAGGTCTTTGTTCTTTGT<br>T   | SEC24C qF     | AACGTCAACCAGTCAGTTCCA        |
| Sec24d qR     | GTCTCTGTTCTTGAGCTTCCC        | SEC24C qR     | GGCTCCATAGGGAATGGCG          |
| Psemb4 qF     | ATGGAAGCGTTTTGGGAGTCA        | SEC24D qF     | GTCAACAAGGTTACGTGGCTA        |
| Psemb4 qR     | GTTCTGGGTCCGAGTGATGG         | SEC24D qR     | TAGTGCCATAATGAGGTGGA         |
| Psm2 qF       | TGGACGAGACAAGACACCC          | PSMD8 qF      | GCCGTAATCAGGCGGTCT           |
| Psm2 qR       | CTCCACGAGCATCTCCAGTTC        | PSMD8 qR      | GCCCTTGAGTTGCTCGTACA         |
| Psm8 qF       | GGCATGTACGAGCAACTCAAG        | PSMD11 qF     | GCCTCCATCGACATCCTCC          |
| Psm8 qR       | GCTCAAGCAGAACCAACTTCA        | PSMD11 qR     | GAGCTGCTTTAGCCTTGCTG         |
| Psme4 qF      | AGCGTCAACAAGATAAGAATG<br>CT  | PSMB4 qF      | GAAGCGTTTTTGGGGTTCGC         |
| Psme4 qR      | GCCCGATTCTATATGCTCAA         | PSMB4 qR      | GAGTGGACGGAATGCGGTA          |
| Psm11 qF      | GCAGGAGGTCGAGCTATGTTT        | HLA-A<br>qF   | AAAAGGAGGGAGTTACTACTCA<br>GG |
| Psm11 qR      | TGAGAACCCAAATGCAATGCTT       | HLA-A<br>qR   | GCTGTGAGGGACACATCAGAG        |
| H-2k1<br>qF   | ACCAGCAGTACGCCTACGA          |               |                              |
| H-2k1<br>qR   | AACCAGAACAGCAACGGTCG         |               |                              |

**Supplementary Table 6. Reagents and resources**

| REAGENT or RESOURCE                                         | SOURCE                    | CATALOG                  |
|-------------------------------------------------------------|---------------------------|--------------------------|
| <b>Antibodies</b>                                           |                           |                          |
| iFluor488-conjugated Phalloidin                             | Abcam                     | ab176753                 |
| Rbmab-EPCAM antibody                                        | Abcam                     | ab32392                  |
| anti-mouse PD-1                                             | Bioxcell                  | BE0146; Clone: RMP1-14   |
| Rat IgG2a isotype control                                   | Bioxcell                  | BE0089                   |
| Anti-CD4                                                    | Bioxcell                  | BE0003-1; Clone: GK1.5   |
| Anti-CD8                                                    | Bioxcell                  | BE0004-1; Clone: 53-6.72 |
| beta-2 microglobulin antibody                               | Abcam                     | Ab175031                 |
| Beta-Actin antibody                                         | Abgent                    | AM1829b                  |
| anti-mouse CD8 $\alpha$ (D4W2Z) antibody, rabbit monoclonal | Cell Signaling Technology | 98941S                   |
| Cleaved caspase 3 (Asp175) antibody                         | Cell signaling Technology | 9661S                    |
| mouse Ki-67 antibody                                        | Cell signaling Technology | 12202S                   |
| AF594-conjugated anti-mouse CD31                            | Biolegend                 | 102520                   |
| APC-conjugated anti-mouse CD140a                            | Biolegend                 | 135907                   |
| PE-conjugated anti-mouse CD326                              | Biolegend                 | 118206                   |
| AF647-conjugated anti-mouse CD326                           | Biolegend                 | 118212                   |
| FITC-conjugated Mouse $\alpha$ -Smooth Muscle Actin         | GeneTex                   | GTX72531                 |
| AF647-conjugated Donkey anti-rabbit IgG                     | Biolegend                 | 406414                   |
| APC/Cy7-conjugated anti-human CD8a                          | Biolegend                 | 300926                   |
| APC-conjugated anti-human IFN $\gamma$                      | Biolegend                 | 502512                   |
| PE-conjugated anti-human TNF $\alpha$                       | Biolegend                 | 502909                   |
| APC-conjugated anti-mouse IFN $\gamma$                      | Biolegend                 | 505810                   |
| PE-conjugated anti-mouse TNF $\alpha$                       | Biolegend                 | 506306                   |
| PerCP/Cyanine5.5-conjugated anti-human/mouse Granzyme B     | Biolegend                 | 372212                   |
| BV605-conjugated anti-mouse CD45                            | Biolegend                 | 103139                   |
| PE/Cy7-conjugated anti-mouse CD3                            | Biolegend                 | 100220                   |
| AF700-conjugated anti-mouse CD4                             | Biolegend                 | 100430                   |
| APC/Cy7-conjugated anti-mouse CD8                           | Biolegend                 | 100714                   |
| APC-conjugated anti-mouse CD8                               | Biolegend                 | 126613                   |
| PE-conjugated anti-mouse CD11b                              | Biolegend                 | 101208                   |
| AF647-conjugated anti-mouse CD11c                           | Biolegend                 | 117312                   |
| PerCP/Cy5.5-conjugated anti-mouse Fn/80                     | Biolegend                 | 123128                   |
| BV421-conjugated anti-mouse I-A/I-E                         | Biolegend                 | 107631                   |
| BV650-conjugated anti-mouse CD19                            | Biolegend                 | 115541                   |
| PE-conjugated anti-mouse H-2Kb bound to SIINFEKL antibody   | Biolegend                 | 141603                   |

|                                                            |                          |               |
|------------------------------------------------------------|--------------------------|---------------|
| APC-conjugated anti-mouse H-2Kb bound to SIINFEKL antibody | Biologend                | 141606        |
| FITC-Anti-Human HLA-A,B,C antibody                         | Biologend                | 311403        |
| FITC-Anti-Human HLA-A2 antibody                            | Biologend                | 343303        |
| FITC-conjugated anti-H-2Kb                                 | Biologend                | 116505        |
| FITC-conjugated anti-Rat IgG                               | Biologend                | 407505        |
| FITC-conjugated anti-mouse IgG                             | Biologend                | 406001        |
| SYTOX™ Blue dead cells                                     | Invitrogen               | 2078615       |
| <b>Chemicals, Peptides, Proteins and Consumables</b>       |                          |               |
| Matrigel                                                   | Corning                  | 356255        |
| Mouse IL2                                                  | Biologend                | 575402        |
| Human IL2                                                  | Biologend                | 589102        |
| Image-iT™ Green Hypoxia reagent                            | Invitrogen               | 114833        |
| phorbol 12-myristate 13-acetate                            | Sigma-Aldrich            | 16561-29-8    |
| Ionomycin                                                  | Sigma-Aldrich            | 56092-82-1    |
| Brefeldin A                                                | Biologend                | 420601        |
| Cell strainers (40 µm)                                     | Fisher Scientific        | 07201430      |
| Cell strainers (70 µm)                                     | Fisher Scientific        | 07201431      |
| Cell strainers (100 µm)                                    | Fisher Scientific        | 07201432      |
| Cell strainers (150 µm)                                    | pluriStrainer            | 43-50150-03   |
| Cell strainers (300 µm)                                    | pluriStrainer            | 43-50300-03   |
| Cell strainers (500 µm)                                    | pluriStrainer            | 43-50500-03   |
| Mouse tumour dissociation kit                              | Milenyi Biotec           | 130-096-730   |
| Human tumour dissociation kit                              | Milenyi Biotec           | 130-095-929   |
| Human CD8+ magnetic beads                                  | Milenyi Biotec           | 130-045-201   |
| Mouse CD8+ magnetic beads                                  | Milenyi Biotec           | 130-117-044   |
| Dynabeads Human T activator CD3/CD28                       | Gibco                    | 11131D        |
| Dynabeads Mouse T activator CD3/CD28                       | Gibco                    | 11452D        |
| BD comp Beads Negative Control                             | BD Biosciences           | 51-90-9001291 |
| BD comp Beads Anti-Mouse Ig,κ                              | BD Biosciences           | 51-90-9001229 |
| BD comp Beads Anti-Rat and Anti-Hamster Ig,κ               | BD Biosciences           | 51-90-9000949 |
| low-attachment surface 96-well microplate                  | Corning                  | 3474          |
| low-attachment surface 24-well microplate                  | Corning                  | 3473          |
| low-attachment surface 6-well microplate                   | Corning                  | 3471          |
| 8-Well glass EZ Slide                                      | Millicell                | R8AA09916     |
| RNeasy mini-isolation kit                                  | QIAGEN                   | 157029493     |
| QIAseq FastSelect rRNA Removal HMR Kit                     | QIAGEN                   | 334387        |
| KAPA RNA Hyper Prep Kit                                    | Roche Corporate          | KK8541        |
| QscriptXLT cDNA super Mix                                  | Quantabio                | 66141329      |
| SYBR Green fastmix low Rox                                 | TaKaRa                   | 4385610       |
| Lipofectamine 3000 reagent                                 | Thermo Fisher Scientific | 25530049      |
| Premix WST-1 assay                                         | TaKaRa                   | MK400         |
| Prolong Gold anti-fade medium                              | Invitrogen               | P36930        |
| Cytofix/cytoperm fixation/permeabilization kit             | BD Biosciences           | 554714        |
| TRIzol                                                     | Ambion                   | 260808        |

|                                                                 |                   |                                                                                                 |
|-----------------------------------------------------------------|-------------------|-------------------------------------------------------------------------------------------------|
| RBC lysis buffer(10X)                                           | Biologend         | 420301                                                                                          |
| Dual-luciferase report 1000 assay system                        | Promega           | E1980                                                                                           |
| ELISA MAX™ Deluxe Set Human TNF- $\alpha$                       | Biologend         | 430204                                                                                          |
| ELISA MAX™ Deluxe Set Mouse TNF- $\alpha$                       | Biologend         | 430904                                                                                          |
| ELISA MAX™ Deluxe Set Human IFN- $\gamma$                       | Biologend         | 430104                                                                                          |
| ELISA MAX™ Deluxe Set Mouse IFN- $\gamma$                       | Biologend         | 430804                                                                                          |
| Epigenetic drug library                                         | Cayman Chemical   | 11071                                                                                           |
| <b>Cells and Cell Lines</b>                                     |                   |                                                                                                 |
| MDA-MB-468                                                      | ATCC              | Cat# HTB-132;<br>RRID:CVCL_0419                                                                 |
| HEK293T                                                         | ATCC              | Cat# CRL-3216;<br>RRID: CVCL_0063                                                               |
| EO771                                                           | CH3 BioSystems    | Cat# 940001; RRID:<br>CVCL_GR23                                                                 |
| Anti-NY-ESO-1 human CD8+ T cells                                | ASTARTE Biologics | 1093-4245MA19                                                                                   |
| Mouse beta-2-microglobulin (B2M) shRNA bacterial Glycerol stock | Sigma-Aldrich     | SHCLNG-NM_00935,<br>TRCN0000288438                                                              |
| <b>Software and Algorithms</b>                                  |                   |                                                                                                 |
| FlowJo                                                          | N/A               | FlowJo version 10.6.0                                                                           |
| GraphPad                                                        | N/A               | GraphPad Prism 8.0 software                                                                     |
| Matlab                                                          | MathWorks Inc.    | Version 8.2.1, R2016b                                                                           |
| IMARIS                                                          | N/A               | IMARIS x64 8.1.2                                                                                |
| ImageJ                                                          | N/A               | ImageJ (64bit 1.50e)                                                                            |
| Mass Cytometry                                                  | Cytobank          | <a href="https://cytobank.org/">https://cytobank.org/</a>                                       |
| R                                                               | N/A               | <a href="https://www.R-project.org/">https://www.R-project.org/</a>                             |
| Gene Set Enrichment Analysis (GSEA)                             | N/A               | <a href="http://software.broadinstitute.org/gsea/">http://software.broadinstitute.org/gsea/</a> |
